# Supplementary material
Source: PubMed Central journal article supplement (PMC3707110)
Supplement: NIHMS486163-supplement-Suppl_Data.pdf [file NIHMS486163-supplement-Suppl_Data.pdf]

# SUPPLEMENTARY INFORMATION

## Global Identification of Peptidase Specificity by Multiplex Substrate Profiling

Anthony J. O'Donoghue<sup>1</sup>, A. Alegra Eroy-Reveles<sup>1,4</sup>, Giselle M. Knudsen<sup>1</sup>, Jessica Ingram<sup>2</sup>, Min Zhou<sup>1</sup>, Jacob B. Statnekov<sup>1</sup>, Alexander L. Greninger<sup>3</sup>, Daniel R. Hostetter<sup>1</sup>, Gang Qu<sup>5</sup>, David A. Maltby<sup>1</sup>, Marc O. Anderson<sup>4</sup>, Joseph L. DeRisi<sup>3</sup>, James H. McKerrow<sup>2</sup>, Alma L. Burlingame<sup>1</sup>, Charles S. Craik<sup>1,\*</sup>

<sup>1</sup>Dept. of Pharmaceutical Chemistry, UCSF,

<sup>2</sup>Sandler Center for Drug Discovery, UCSF,

<sup>3</sup>Howard Hughes Medical Institute and Dept. of Biochemistry and Biophysics, UCSF,

<sup>4</sup>Dept. of Chemistry and Biochemistry, San Francisco State University,

<sup>5</sup>Dept. of Electrical and Computer Engineering, University of Maryland

### Contents:

Supplementary Tables 1-5

Supplementary Figures 1-5

## SUPPLEMENTARY TABLES

**Supplementary Table 1: Calculation of Pearson correlation coefficients to compare MSP-MS and COFRADIC assays.** Recombinant mouse cathepsin E purchased from R&D Systems was used in both assays. The negative and positive selection values of each amino acid was determined using the Z score calculator in iceLogo. Cleavage at 233 sites in the 1200 minute MSP-MS assay was compared to 1223 sites in the mouse proteome that were identified by COFRADIC (<http://merops.sanger.ac.uk/cgi-bin/substrates?id=A01.010>). Nle in the MSP-MS assay was compared to Met in the COFRADIC assay.

|                            |     | P4    | P3    | P2    | P1    | P1'   | P2'   | P3'   | P4'   |
|----------------------------|-----|-------|-------|-------|-------|-------|-------|-------|-------|
| <b>Pearson Correlation</b> |     | -0.09 | 0.12  | 0.40  | 0.87  | 0.78  | 0.55  | 0.20  | 0.27  |
| <b>MSP-MS</b>              |     |       |       |       |       |       |       |       |       |
|                            | Gly | 0.42  | 1.34  | -2.58 | -2.85 | -1.84 | -1.76 | -1.26 | 0.87  |
|                            | Ala | 1.26  | -0.33 | 1.34  | -1.50 | 1.11  | 0.83  | -0.58 | -0.42 |
|                            | Ser | 2.86  | 0.17  | 0.49  | -2.28 | -0.63 | 0.00  | 0.40  | 1.39  |
|                            | Pro | 1.32  | 1.01  | -0.65 | -2.68 | -1.31 | -1.79 | -1.90 | 0.85  |
|                            | Val | -0.61 | 0.80  | 1.99  | -2.74 | 3.32  | 1.73  | 0.15  | -0.28 |
|                            | Thr | 1.19  | 2.35  | -0.52 | -1.57 | -0.98 | 1.01  | 0.10  | -1.17 |
|                            | Cys | -     | -     | -     | -     | -     | -     | -     | -     |
|                            | Leu | 1.47  | 1.50  | 1.37  | 4.09  | 1.71  | 0.40  | 0.33  | 0.56  |
|                            | Ile | -0.18 | 0.74  | 3.15  | -0.94 | 2.60  | 1.26  | 3.96  | 1.29  |
|                            | Asn | -0.28 | -1.54 | 0.05  | 0.09  | -1.87 | -1.44 | -1.43 | -1.29 |
|                            | Asp | 0.40  | 0.80  | 0.49  | -1.24 | -2.17 | -0.79 | -1.86 | 0.16  |
|                            | Gln | 0.96  | -1.61 | 0.51  | -1.15 | -1.19 | -0.04 | 0.28  | 0.11  |
|                            | Lys | 0.15  | -0.21 | -0.75 | -2.08 | -2.39 | -1.27 | 0.18  | 0.42  |
|                            | Glu | -0.23 | 0.47  | 0.85  | 0.22  | -1.84 | -0.13 | -0.58 | 0.06  |
|                            | Nle | -0.64 | 0.17  | -0.33 | 5.74  | 3.85  | -0.04 | -0.12 | -1.61 |
|                            | His | -0.21 | 0.56  | -2.05 | -1.55 | -2.14 | -1.54 | -1.38 | -1.13 |
|                            | Phe | 0.40  | 0.59  | 2.06  | 8.56  | 1.71  | 0.35  | -1.07 | -1.44 |
|                            | Arg | 1.41  | 1.17  | -0.60 | -1.99 | -1.73 | 1.36  | 0.80  | -0.58 |
|                            | Tyr | 0.35  | 0.37  | -0.48 | 1.46  | 2.60  | -0.48 | 0.33  | -0.99 |
|                            | Trp | 0.27  | 1.68  | 0.91  | 3.22  | 1.68  | -1.02 | 0.20  | -0.66 |
| <b>COFRADIC</b>            |     |       |       |       |       |       |       |       |       |
|                            | Gly | 3.03  | -2.78 | -4.69 | -6.92 | -7.26 | -3.57 | -0.99 | 6.61  |
|                            | Ala | 2.63  | -3.53 | 3.71  | -3.20 | 8.79  | 9.98  | 0.25  | 5.76  |
|                            | Ser | -2.21 | -2.61 | 1.05  | -9.13 | -4.49 | 1.05  | -1.52 | -1.52 |
|                            | Pro | 3.38  | -5.48 | -8.58 | -8.70 | -8.12 | -8.70 | -6.97 | -0.99 |
|                            | Val | -0.36 | 5.64  | 8.07  | -7.97 | 18.68 | 11.64 | 4.37  | 1.37  |
|                            | Thr | -0.42 | 0.81  | -0.42 | -5.74 | -4.38 | 3.66  | 2.42  | 1.68  |
|                            | Cys | -1.20 | -1.58 | 0.90  | 0.33  | -3.69 | 0.71  | -2.35 | -2.16 |
|                            | Leu | -3.77 | 0.74  | -6.30 | 34.67 | 5.70  | -2.24 | 1.28  | -3.32 |
|                            | Ile | -1.22 | 3.32  | 3.46  | -6.58 | 16.25 | 4.01  | 4.01  | 0.43  |
|                            | Asn | -0.39 | -1.61 | 3.24  | -5.24 | -2.36 | -2.06 | 2.18  | 1.73  |
|                            | Asp | 3.00  | 4.94  | 10.38 | -3.72 | -2.30 | -1.65 | 4.17  | 0.16  |
|                            | Gln | -1.03 | -1.03 | 1.99  | -5.64 | -4.98 | 2.51  | 1.46  | 2.25  |
|                            | Lys | -1.69 | -0.12 | -3.01 | -8.19 | -5.78 | 1.68  | 4.33  | 4.21  |
|                            | Glu | 2.50  | 4.34  | 6.93  | 0.67  | -2.25 | 3.37  | 4.99  | 1.96  |
|                            | Met | -0.69 | 2.22  | 0.86  | 10.76 | 2.80  | -0.69 | 2.22  | 0.09  |
|                            | His | -0.58 | -2.73 | -2.55 | -5.59 | -5.59 | -5.59 | -5.59 | -5.23 |
|                            | Phe | -0.02 | 3.11  | -4.63 | 34.07 | 5.19  | -5.23 | -3.00 | -3.89 |
|                            | Arg | 0.26  | -3.60 | -4.56 | -7.46 | -8.30 | -8.30 | -8.30 | -8.30 |
|                            | Tyr | -0.54 | 1.20  | -2.97 | 4.15  | 2.93  | -3.15 | -3.84 | -2.28 |
|                            | Trp | -2.32 | -0.25 | -3.87 | -2.58 | -3.87 | -3.87 | -3.87 | -3.87 |

**Supplementary Table 2: Screening of proteolytic activity using viral proteases expressed in a bacterial IVTT system.** A selection of viral proteases were incubated with a peptide mixture consisting of three peptides from the MSP-MS library and six peptides corresponding to viral polypeptide processing sites. \* indicates a commercial preparation of enzyme.

| Peptide Substrate | Peptide Sequence | HRV14* | HRV14 | EV71 | Polio | HAV | Klasse |
|-------------------|------------------|--------|-------|------|-------|-----|--------|
| TDP-18            | YnDSIRHQ↓GPFQnL  | Yes    | Yes   | Yes  | Yes   | Yes | Yes    |
| TDP-67            | nEFHWRInQ↓GKKAP  | No     | No    | No   | No    | No  | No     |
| TDP-101           | RKWQ↓SPQVDLYDKS  | No     | No    | No   | No    | No  | No     |
| Hrv14_2C-3A       | SLETLFQ↓GPVYKDL  | Yes    | Yes   | Yes  | Yes   | No  | No     |
| Hrv14_3C-3D       | QYFVEKQ↓GQVIARH  | Yes    | Yes   | Yes  | No    | No  | No     |
| Klassevirus_2B-3C | QAAGGRQ↓GVRDYND  | No     | No    | No   | No    | No  | No     |
| Klassevirus_3C-3D | SNLATPQ↓SVLHFHP  | No     | No    | No   | No    | No  | No     |
| CVB3_2A           | MTNTGAF↓GQQSGAA  | No     | No    | No   | No    | No  | No     |
| Hrv2_2A           | RPIITTA↓GPSDMYV  | No     | No    | No   | No    | No  | No     |

**Supplementary Table 3: Complete list of proteins identified in conditioned media from a mouse pancreatic ductal adenocarcinoma.** Proteomic analysis was performed on conditioned media from three biological samples. Proteins observed in 2 or more replicates are reported. Proteins are ordered by relative abundance as estimated from spectral counting. Proteolytic enzymes and inhibitors and highlighted in green and red, respectively. Raw data files are available from ProteomeCommons.org Tranche using the following hash:  
**wM5aFPz1/VVUCSdmdZMX/MAPB2abMc0ggtXHzwZc+6ZQG/79fVnOtSgt8PsY8daOdU346QzNgpOlluScmJACXO/IBQAAAAAACrQ==**

| Acc #   | Protein Name                                               | Protein MW | Replicates Observed | Unique Peptides | Peptide Count | Percent Coverage | Best Database Score | Best Expect Value |
|---------|------------------------------------------------------------|------------|---------------------|-----------------|---------------|------------------|---------------------|-------------------|
| P10493  | Nidogen-1                                                  | 136538.9   | 3                   | 31              | 77            | 36.1             | 9.27                | 1.50E-16          |
| P04186  | Complement factor B                                        | 85005.3    | 3                   | 31              | 97            | 50.3             | 10.06               | 5.00E-18          |
| Q61468  | Mesothelin                                                 | 69423.9    | 3                   | 26              | 130           | 44.3             | 8.59                | 2.70E-15          |
| Q06890  | Clusterin                                                  | 51656.1    | 3                   | 28              | 181           | 44               | 9.93                | 8.80E-18          |
| Q92111  | Serotransferrin                                            | 76724.6    | 3                   | 28              | 90            | 47.5             | 7.85                | 6.30E-14          |
| Q61508  | Extracellular matrix protein 1                             | 62832.8    | 3                   | 26              | 75            | 62.4             | 11.4                | 1.60E-20          |
| Q07797  | Galectin-3-binding protein                                 | 64491.7    | 3                   | 20              | 85            | 45.6             | 10.41               | 1.10E-18          |
| Q61398  | Procollagen C-endopeptidase enhancer 1                     | 50168.5    | 3                   | 20              | 72            | 59.4             | 9.55                | 4.40E-17          |
| Q61147  | Ceruloplasmin                                              | 121152.4   | 3                   | 22              | 58            | 29.5             | 8.57                | 2.90E-15          |
| Q02819  | Nucleobindin-1                                             | 53409.1    | 3                   | 23              | 70            | 56.9             | 7.65                | 1.50E-13          |
| P09803  | Cadherin-1                                                 | 98256.7    | 3                   | 23              | 77            | 29.6             | 12.44               | 2.00E-22          |
| Q8BPP5  | EGF-containing fibulin-like extracellular matrix protein 1 | 54953.4    | 3                   | 15              | 44            | 45.6             | 15.72               | 1.70E-28          |
| Q5JCT0  | Core2-GlcNAc-transferase 3                                 | 50698.9    | 3                   | 17              | 51            | 45.5             | 8.28                | 1.00E-14          |
| P35951  | Low-density lipoprotein receptor                           | 95135.6    | 3                   | 15              | 41            | 28               | 9.7                 | 2.30E-17          |
| P12023  | Amyloid beta A4 protein                                    | 86722.8    | 3                   | 17              | 36            | 27.1             | 8.52                | 3.60E-15          |
| Q00493  | Carboxypeptidase E                                         | 53256.3    | 3                   | 16              | 51            | 50.4             | 9.58                | 3.90E-17          |
| P52480  | Pyruvate kinase isozymes M1/M2                             | 57845.4    | 3                   | 15              | 29            | 43.5             | 11.8                | 3.00E-21          |
| P10923  | Osteopontin                                                | 32459.7    | 3                   | 13              | 62            | 54.4             | 10.42               | 1.10E-18          |
| P22777  | Plasminogen activator inhibitor 1                          | 45170.6    | 3                   | 17              | 43            | 48.3             | 7.69                | 1.20E-13          |
| P60710  | Actin, cytoplasmic 1                                       | 41737.1    | 3                   | 14              | 34            | 54.7             | 8.04                | 2.70E-14          |
| Q8BND5  | Sulfhydryl oxidase 1                                       | 82786      | 3                   | 12              | 29            | 22.1             | 9.45                | 6.80E-17          |
| P70275  | Semaphorin-3E                                              | 89544      | 3                   | 14              | 28            | 24.4             | 10.16               | 3.40E-18          |
| P07214  | SPARC                                                      | 34450.4    | 3                   | 11              | 50            | 56               | 9.16                | 2.30E-16          |
| Q61581  | Insulin-like growth factor-binding protein 7               | 28969.7    | 3                   | 11              | 42            | 56.2             | 8.77                | 1.20E-15          |
| Q62181  | Semaphorin-3C                                              | 85289.8    | 3                   | 13              | 23            | 24.1             | 9.03                | 4.10E-16          |
| P10605  | Cathepsin B                                                | 37280.2    | 3                   | 12              | 39            | 38.3             | 8.62                | 2.40E-15          |
| P17742  | Peptidyl-prolyl cis-trans isomerase A                      | 17971.5    | 3                   | 11              | 38            | 58.5             | 10.05               | 5.40E-18          |
| Q05793  | Perlecan                                                   | 398297.7   | 3                   | 11              | 26            | 4                | 8.32                | 8.30E-15          |
| Q62165  | Dystroglycan                                               | 96905.5    | 3                   | 10              | 26            | 19.3             | 8.36                | 7.20E-15          |
| Q61282  | Aggrecan core protein                                      | 221942.7   | 3                   | 10              | 25            | 9                | 8.74                | 1.40E-15          |
| Q9DAU7  | WAP four-disulfide core domain protein 2                   | 18031.8    | 3                   | 8               | 44            | 39.1             | 12.17               | 6.20E-22          |
| P47879  | Insulin-like growth factor-binding protein 4               | 27807.2    | 3                   | 9               | 40            | 40.9             | 10.36               | 1.40E-18          |
| P21460  | Cystatin-C                                                 | 15531      | 3                   | 8               | 38            | 55               | 8.7                 | 1.60E-15          |
| P25785  | Metalloproteinase inhibitor 2                              | 24328.4    | 3                   | 11              | 23            | 50               | 7.72                | 1.10E-13          |
| P63101  | 14-3-3 protein zeta/delta                                  | 27771.4    | 3                   | 10              | 25            | 47.3             | 7.92                | 4.60E-14          |
| P01887  | Beta-2-microglobulin                                       | 13823.1    | 3                   | 7               | 21            | 74.8             | 11.94               | 1.60E-21          |
| P07356  | Annexin A2                                                 | 38676.5    | 3                   | 9               | 25            | 29.8             | 6.42                | 2.80E-11          |
| P06151  | L-lactate dehydrogenase A chain                            | 36498.9    | 3                   | 9               | 29            | 31               | 6.76                | 6.50E-12          |
| O88968  | Transcobalamin-2                                           | 47586.2    | 2                   | 10              | 14            | 29.8             | 9.07                | 3.40E-16          |
| Q62266  | Cornifin-A                                                 | 15765.4    | 3                   | 8               | 18            | 71.5             | 7.38                | 4.60E-13          |
| Q61001  | Laminin subunit alpha-5                                    | 404057.7   | 3                   | 7               | 10            | 3                | 8.59                | 2.70E-15          |
| Q9JJH1  | Ribonuclease 4                                             | 17024.8    | 3                   | 7               | 22            | 51.4             | 7.81                | 7.60E-14          |
| Q91XA2  | Golgi membrane protein 1                                   | 44310.6    | 3                   | 8               | 26            | 24.4             | 6.98                | 2.60E-12          |
| Q08423  | Trefoil factor 1                                           | 9670.2     | 3                   | 5               | 52            | 55.2             | 8.36                | 7.00E-15          |
| Q60997  | Deleted in malignant brain tumors 1 protein                | 226817.4   | 3                   | 5               | 9             | 5.3              | 10.35               | 1.50E-18          |
| P10853  | Histone H2B type 1-F/J/L                                   | 13936.3    | 3                   | 7               | 34            | 38.1             | 7.27                | 7.40E-13          |
| P09411  | Phosphoglycerate kinase 1                                  | 44550.9    | 3                   | 6               | 11            | 19.2             | 7.85                | 6.20E-14          |
| Q03404  | Trefoil factor 2                                           | 14172.4    | 3                   | 4               | 14            | 69               | 10.76               | 2.60E-19          |
| P62806  | Histone H4                                                 | 11367.4    | 3                   | 6               | 15            | 52.4             | 6.75                | 6.70E-12          |
| P26040  | Ezrin                                                      | 69407.4    | 3                   | 7               | 15            | 15               | 6.3                 | 1.80E-11          |
| P02468  | Laminin subunit gamma-1                                    | 177300.2   | 2                   | 5               | 8             | 3.5              | 10.05               | 3.20E-18          |
| P08228  | Superoxide dismutase [Cu-Zn]                               | 15942.8    | 3                   | 5               | 11            | 66.2             | 7.45                | 3.40E-13          |
| P17182  | Alpha-enolase                                              | 47141.2    | 3                   | 5               | 13            | 17.3             | 8.17                | 1.60E-14          |
| Q61937  | Nucleophosmin                                              | 32560.3    | 3                   | 5               | 17            | 27.4             | 9.5                 | 5.40E-17          |
| P62962  | Profilin-1                                                 | 14957.4    | 3                   | 5               | 9             | 35               | 6.83                | 4.80E-12          |
| P24369  | Peptidyl-prolyl cis-trans isomerase B                      | 23713.7    | 3                   | 6               | 12            | 31.9             | 6.4                 | 3.00E-11          |
| Q00724  | Retinol-binding protein 4                                  | 23206.3    | 3                   | 5               | 11            | 29.4             | 9.21                | 1.90E-16          |
| Q00993  | Tyrosine-protein kinase receptor UFO                       | 98191.8    | 3                   | 5               | 10            | 8                | 5.46                | 1.70E-09          |
| P10648  | Glutathione S-transferase A2                               | 25533.2    | 3                   | 5               | 10            | 25.2             | 7.69                | 1.20E-13          |
| Q3TNNW5 | Diffuse panbronchiolitis critical region protein 1 homolog | 54310.2    | 3                   | 4               | 21            | 12.6             | 6.71                | 8.10E-12          |
| O88593  | Peptidoglycan recognition protein 1                        | 20489.4    | 3                   | 3               | 5             | 39               | 8.34                | 7.80E-15          |
| P08226  | Apolipoprotein E                                           | 35866.9    | 3                   | 6               | 10            | 21.2             | 5.39                | 2.30E-09          |

|        |                                                      |          |   |   |    |      |       |          |
|--------|------------------------------------------------------|----------|---|---|----|------|-------|----------|
| P63017 | Heat shock cognate 71 kDa protein                    | 70871.6  | 3 | 5 | 11 | 9.3  | 6.7   | 8.60E-12 |
| Q9R098 | Hepatocyte growth factor activator                   | 70568.5  | 3 | 4 | 5  | 9.3  | 10.71 | 3.20E-19 |
| P35700 | Peroxisiredoxin-1                                    | 22176.7  | 3 | 6 | 9  | 27.6 | 4.28  | 1.70E-07 |
| P70269 | Cathepsin E                                          | 42938    | 3 | 5 | 11 | 9.6  | 6.03  | 1.50E-10 |
| P15116 | Cadherin-2                                           | 99797.2  | 3 | 4 | 9  | 6.8  | 7.17  | 1.10E-12 |
| P70296 | Phosphatidylethanolamine-binding protein 1           | 20830.6  | 2 | 3 | 4  | 34.8 | 8.22  | 1.30E-14 |
| Q9Z1P8 | Angiotensinogen-related protein 4                    | 45538.7  | 3 | 3 | 9  | 13.7 | 8.57  | 2.90E-15 |
| Q64695 | Endothelial protein C receptor                       | 27212.3  | 3 | 3 | 12 | 23.6 | 7.85  | 6.20E-14 |
| P20152 | Vimentin                                             | 53688.1  | 3 | 4 | 7  | 9    | 5.93  | 2.30E-10 |
| P06797 | Cathepsin L1                                         | 37547.7  | 3 | 4 | 9  | 15.3 | 7.26  | 4.90E-13 |
| Q01768 | Nucleoside diphosphate kinase B                      | 17363.2  | 3 | 3 | 5  | 36.2 | 6.39  | 3.10E-11 |
| P30412 | Peptidyl-prolyl cis-trans isomerase C                | 22794.4  | 3 | 4 | 9  | 33   | 6.15  | 8.80E-11 |
| P05064 | Fructose-bisphosphate aldolase A                     | 39356.3  | 3 | 4 | 7  | 12.4 | 5.23  | 4.50E-09 |
| Q9R069 | Basal cell adhesion molecule                         | 67670.7  | 3 | 3 | 7  | 7.2  | 7.97  | 3.70E-14 |
| P18760 | Cofilin-1                                            | 18559.7  | 3 | 3 | 7  | 31.9 | 6.54  | 1.70E-11 |
| P10810 | Monocyte differentiation antigen CD14                | 39204.3  | 3 | 3 | 6  | 11.7 | 7.36  | 5.10E-13 |
| P10126 | Elongation factor 1-alpha 1                          | 50114.3  | 2 | 3 | 5  | 16.2 | 7.55  | 2.20E-13 |
| P97467 | Peptidyl-glycine alpha-amidating monooxygenase       | 108963.5 | 3 | 3 | 5  | 7.3  | 7.25  | 8.20E-13 |
| P50228 | C-X-C motif chemokine 5                              | 14190.1  | 2 | 4 | 6  | 33.3 | 5.09  | 3.00E-09 |
| Q9EPL2 | Calsyntenin-1                                        | 108900.6 | 2 | 4 | 5  | 5.4  | 4.5   | 6.00E-09 |
| Q00731 | Vascular endothelial growth factor A                 | 25283.6  | 3 | 3 | 6  | 27.6 | 5.98  | 1.80E-10 |
| P22752 | Histone H2A type 1                                   | 14135.6  | 3 | 4 | 27 | 35.4 | 6.15  | 8.80E-11 |
| Q9ESY9 | Gamma-interferon-inducible lysosomal thiol reductase | 27812.7  | 3 | 3 | 7  | 21   | 8.06  | 2.60E-14 |
| Q62179 | Semaphorin-4B                                        | 91393.1  | 3 | 4 | 9  | 7.2  | 5.15  | 6.30E-09 |
| P11499 | Heat shock protein HSP 90-beta                       | 83281.9  | 3 | 4 | 7  | 6.1  | 6.24  | 6.00E-11 |
| P50543 | Protein S100-A11                                     | 11082.8  | 3 | 3 | 12 | 37.8 | 6.3   | 4.60E-11 |
| Q8BMS2 | Spondin-2                                            | 35965    | 2 | 3 | 4  | 12.4 | 6.64  | 1.10E-11 |
| Q9R1Q9 | V-type proton ATPase subunit S1                      | 51008    | 2 | 3 | 4  | 13.4 | 7.06  | 1.80E-12 |
| P15864 | Histone H1.2                                         | 21266.8  | 3 | 3 | 7  | 11.8 | 5.49  | 1.50E-09 |
| Q9DBJ1 | Phosphoglycerate mutase 1                            | 28832.2  | 2 | 3 | 4  | 16.9 | 5.98  | 9.60E-11 |
| P63028 | Translationally-controlled tumor protein             | 19462.4  | 3 | 3 | 6  | 21.5 | 6.25  | 5.70E-11 |
| P16045 | Galectin-1                                           | 14866    | 3 | 3 | 7  | 28.9 | 5.4   | 2.20E-09 |
| Q9EQU5 | Protein SET                                          | 33378    | 3 | 2 | 4  | 15.9 | 7.1   | 1.50E-12 |
| P26350 | Prothymosin alpha                                    | 12254.2  | 3 | 2 | 8  | 26.1 | 6.68  | 9.20E-12 |
| P21107 | Tropomyosin alpha-3 chain                            | 32863.1  | 3 | 3 | 9  | 14.4 | 6.09  | 1.10E-10 |
| Q00623 | Apolipoprotein A-I                                   | 30587.7  | 3 | 3 | 5  | 12.5 | 4.74  | 7.10E-09 |
| Q35639 | Annexin A3                                           | 36384.4  | 3 | 3 | 5  | 10.5 | 5.44  | 1.80E-09 |
| Q9CQ01 | Ribonuclease T2                                      | 29609.1  | 2 | 2 | 3  | 14.3 | 6.08  | 2.00E-11 |
| P02463 | Collagen alpha-1(IV) chain                           | 160680.5 | 2 | 2 | 3  | 1.4  | 6.62  | 1.20E-11 |
| Q8R3G9 | Tetraspanin-8                                        | 25582.5  | 3 | 2 | 7  | 10.2 | 5.9   | 2.60E-10 |
| P15379 | CD44 antigen                                         | 85617.8  | 3 | 2 | 7  | 2.7  | 5.62  | 8.30E-10 |
| P01326 | Insulin-2                                            | 12364.5  | 2 | 2 | 3  | 17.3 | 7.11  | 1.50E-12 |
| P07724 | Serum albumin                                        | 68693.2  | 3 | 2 | 4  | 4.4  | 5.49  | 1.50E-09 |
| P40240 | CD9 antigen                                          | 25258.2  | 3 | 1 | 5  | 11.1 | 10.54 | 6.60E-19 |
| A2ASQ1 | Agrin                                                | 207540.8 | 2 | 2 | 2  | 1.4  | 6.54  | 1.70E-11 |
| P14069 | Protein S100-A6                                      | 10050.7  | 3 | 2 | 22 | 29.2 | 7.67  | 1.30E-13 |
| P62204 | Calmodulin                                           | 16837.7  | 3 | 2 | 4  | 20.8 | 5.35  | 2.70E-09 |
| P35762 | CD81 antigen                                         | 25828.8  | 3 | 1 | 3  | 9.7  | 9.91  | 9.60E-18 |
| Q9QZF2 | Glypican-1                                           | 61360.3  | 2 | 2 | 3  | 6.3  | 5.59  | 1.30E-10 |
| Q9CYN9 | Renin receptor                                       | 39092.3  | 3 | 2 | 6  | 8    | 7.44  | 3.60E-13 |
| P68433 | Histone H3.1                                         | 15404.2  | 3 | 3 | 5  | 16.9 | 4.24  | 3.00E-07 |
| Q9D7Z6 | Calcium-activated chloride channel regulator 1       | 100072.1 | 2 | 2 | 3  | 2.3  | 5.01  | 1.10E-09 |
| Q99JZ0 | Syntenin-2                                           | 31564.9  | 2 | 3 | 3  | 10.6 | 3.54  | 2.10E-06 |
| P34884 | Macrophage migration inhibitory factor               | 12504.4  | 2 | 2 | 4  | 18.3 | 5.35  | 2.70E-09 |
| Q80XD8 | Proline-rich acidic protein 1                        | 16798.1  | 3 | 1 | 3  | 23.5 | 8.7   | 1.70E-15 |
| Q9DCK3 | Tetraspanin-4                                        | 26053.8  | 2 | 1 | 2  | 10.5 | 8.08  | 2.30E-14 |
| Q99JR5 | Tubulointerstitial nephritis antigen-like            | 52665.1  | 3 | 2 | 4  | 4.7  | 4.3   | 1.10E-07 |
| Q9Z0K8 | Pantetheinase                                        | 57091.9  | 2 | 2 | 4  | 3.7  | 5.33  | 3.20E-10 |
| P0CG49 | Polyubiquitin-B                                      | 34368.8  | 2 | 2 | 5  | 7.2  | 5.27  | 2.10E-09 |
| P48678 | Prelamin-A/C                                         | 74238.2  | 3 | 2 | 4  | 3.3  | 4.19  | 3.70E-07 |
| P57780 | Alpha-actinin-4                                      | 104978   | 2 | 2 | 3  | 3.2  | 3.87  | 1.60E-08 |
| P15535 | Beta-1,4-galactosyltransferase 1                     | 44411.5  | 3 | 2 | 5  | 5    | 4.36  | 7.30E-09 |
| P52793 | Ephrin-A1                                            | 23802.4  | 3 | 3 | 5  | 15.1 | 2.87  | 2.50E-07 |
| Q9CR36 | Gastroskin-1                                         | 21887.1  | 3 | 2 | 4  | 15.9 | 4.76  | 2.00E-09 |
| P29533 | Vascular cell adhesion protein 1                     | 81318.2  | 2 | 1 | 2  | 2    | 6.43  | 2.70E-11 |
| P35456 | Urokinase plasminogen activator surface receptor     | 35428.7  | 3 | 1 | 5  | 4    | 6.22  | 6.40E-11 |
| P32261 | Antithrombin-III                                     | 52004    | 3 | 2 | 5  | 4.5  | 3.26  | 1.10E-07 |
| P07091 | Protein S100-A4                                      | 11721.5  | 3 | 1 | 3  | 17.8 | 6.13  | 9.60E-11 |
| O08543 | Ephrin-A5                                            | 26339.3  | 2 | 1 | 2  | 7.5  | 5.93  | 2.30E-10 |
| P09405 | Nucleolin                                            | 76723.7  | 3 | 2 | 4  | 3.4  | 3.43  | 1.90E-06 |
| Q35887 | Calumenin                                            | 37064    | 2 | 1 | 2  | 4.1  | 5.74  | 1.70E-10 |
| Q6ZWY8 | Thymosin beta-10                                     | 5025.7   | 3 | 1 | 3  | 34.1 | 5.7   | 5.90E-11 |
| Q35660 | Glutathione S-transferase Mu 6                       | 25605.6  | 2 | 1 | 2  | 7.8  | 5.67  | 2.30E-10 |
| P62259 | 14-3-3 protein epsilon                               | 29174.2  | 2 | 1 | 3  | 9.4  | 5.32  | 2.90E-10 |

|        |                                   |          |   |   |    |      |      |          |
|--------|-----------------------------------|----------|---|---|----|------|------|----------|
| Q3UR85 | Myelin gene regulatory factor     | 123288.7 | 2 | 1 | 2  | 1.9  | 5.18 | 3.00E-10 |
| Q61207 | Sulfated glycoprotein 1           | 61422.8  | 3 | 2 | 4  | 3.8  | 3.61 | 3.00E-07 |
| P17751 | Triosephosphate isomerase         | 32192.1  | 2 | 2 | 2  | 7    | 2.65 | 5.40E-07 |
| P27773 | Protein disulfide-isomerase A3    | 56678.8  | 2 | 1 | 2  | 3.2  | 5.02 | 1.10E-08 |
| O89093 | C-C motif chemokine 20            | 10826    | 2 | 2 | 4  | 15.5 | 2.48 | 5.50E-04 |
| O09131 | Glutathione S-transferase omega-1 | 27497.9  | 3 | 1 | 3  | 4.2  | 4.94 | 1.50E-08 |
| O08992 | Syntenin-1                        | 32379.7  | 2 | 1 | 2  | 4.7  | 4.89 | 1.90E-08 |
| P52795 | Ephrin-B1                         | 37859.7  | 2 | 1 | 2  | 3.2  | 4.72 | 3.30E-08 |
| Q9Z0J0 | Epididymal secretory protein E1   | 16442.2  | 2 | 1 | 2  | 10.7 | 4.43 | 2.00E-09 |
| O35188 | Fractalkine                       | 42099    | 3 | 1 | 6  | 2    | 4.02 | 7.80E-07 |
| P16056 | Hepatocyte growth factor receptor | 153550   | 3 | 1 | 3  | 0.8  | 3.9  | 7.10E-08 |
| P47955 | 60S acidic ribosomal protein P1   | 11475    | 2 | 1 | 2  | 14   | 3.8  | 1.30E-07 |
| P55292 | Desmocollin-2                     | 99962.3  | 3 | 1 | 3  | 0.9  | 3.79 | 1.30E-08 |
| P37889 | Fibulin-2                         | 131819.9 | 2 | 1 | 2  | 1.1  | 3.61 | 3.60E-09 |
| Q60605 | Myosin light polypeptide 6        | 16930.2  | 2 | 1 | 2  | 10.6 | 3.23 | 1.60E-07 |
| P15119 | Mast cell protease 2              | 26732.1  | 2 | 1 | 2  | 4.1  | 3.03 | 1.60E-06 |
| P01325 | Insulin-1                         | 12160.3  | 2 | 1 | 22 | 6.5  | 2.15 | 6.80E-06 |
| P70168 | Importin subunit beta-1           | 97185    | 2 | 1 | 2  | 1    | 2.11 | 3.50E-05 |
| P29699 | Alpha-2-HS-glycoprotein           | 37326    | 2 | 1 | 2  | 2    | 1.42 | 3.00E-05 |

**Supplementary Table 4: Complete list of \*\*F\* motifs in the MSP-MS library.** The first observed time of motif cleavage by cathepsin E is listed. “Never” indicates that cleavage was not observed by 1200 minutes.

| **F↓* Sequences | Cleavage first observed (minutes) | **F↓* Sequences | Cleavage first observed (minutes) |
|-----------------|-----------------------------------|-----------------|-----------------------------------|
| nYFK            | Never                             | DH FY           | 30                                |
| HPFK            | Never                             | IVFI            | 30                                |
| GSFK            | Never                             | TnFI            | 30                                |
| AnFR            | Never                             | WAFR            | 15                                |
| IFFR            | Never                             | nQFN            | 15                                |
| TAFR            | Never                             | EQFT            | 15                                |
| TYFH            | Never                             | WKFG            | 15                                |
| nEFH            | Never                             | YEFG            | 15                                |
| QRFH            | Never                             | VIFF            | 15                                |
| AHFH            | Never                             | LFFW            | 15                                |
| ELFD            | Never                             | IHFK            | 5                                 |
| ETFD            | Never                             | HNFH            | 5                                 |
| FKFD            | Never                             | PSFN            | 5                                 |
| SRFD            | Never                             | VNFQ            | 5                                 |
| NIFE            | Never                             | AWFS            | 5                                 |
| VGFE            | Never                             | GRFG            | 5                                 |
| HGFE            | Never                             | RLFF            | 5                                 |
| KIFN            | Never                             | GPFW            | 5                                 |
| HLFN            | Never                             | YDFW            | 5                                 |
| HTFQ            | Never                             | PDFY            | 5                                 |
| SKFQ            | Never                             | GIFY            | 5                                 |
| YHFQ            | Never                             | SAFA            | 5                                 |
| QVFS            | Never                             | nEFA            | 5                                 |
| KQFT            | Never                             | LIFV            | 5                                 |
| EnFG            | Never                             | PnFV            | 5                                 |
| DnFP            | Never                             | LYFI            | 5                                 |
| ENFP            | Never                             | VnFL            | 5                                 |
| FQFP            | Never                             | ANFL            | 5                                 |
| PKFA            | Never                             | nSFn            | 5                                 |
| nTFI            | Never                             | KRFn            | 5                                 |
| PAFn            | Never                             | VnFn            | 5                                 |
| NDFT            | 1200                              | nAFn            | 5                                 |
| KSFG            | 1200                              | KVFn            | 5                                 |
| IWFD            | 240                               |                 |                                   |
| WHFS            | 240                               |                 |                                   |
| HHFT            | 60                                |                 |                                   |
| GPFH            | 30                                |                 |                                   |





## SUPPLEMENTARY FIGURES

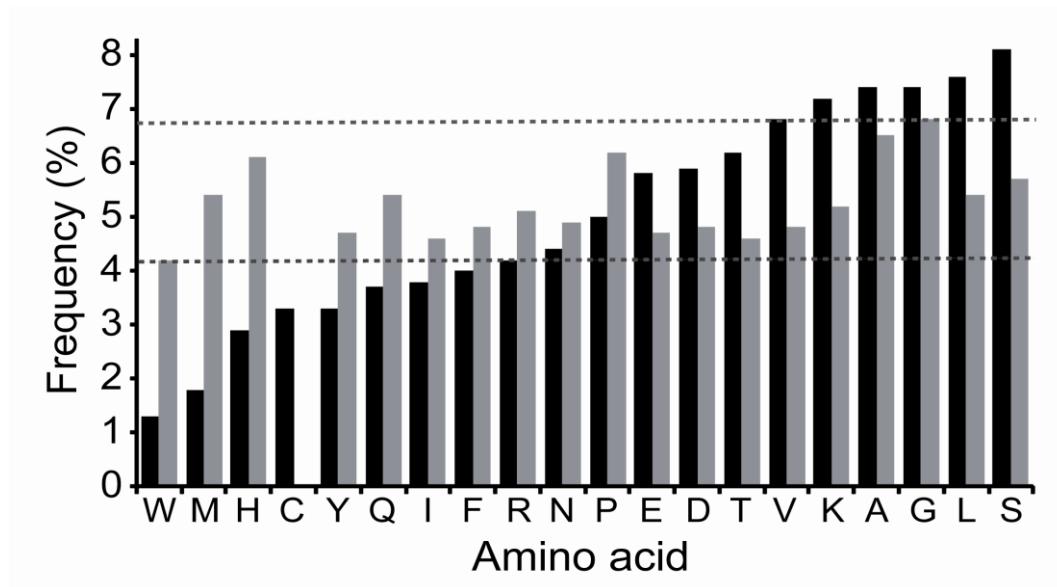

**Supplementary Figure 1: Comparison of amino acid frequency between the synthetic tetradecapeptide library and vertebrate proteome.** The vertebrate proteome data (black bars) was generated from SwissProt and grey bars represent the amino acid frequency of the 124-member tetradecapeptide library. The upper and lower frequency of amino acids in the tetradecapeptide library are illustrated with a broken line.

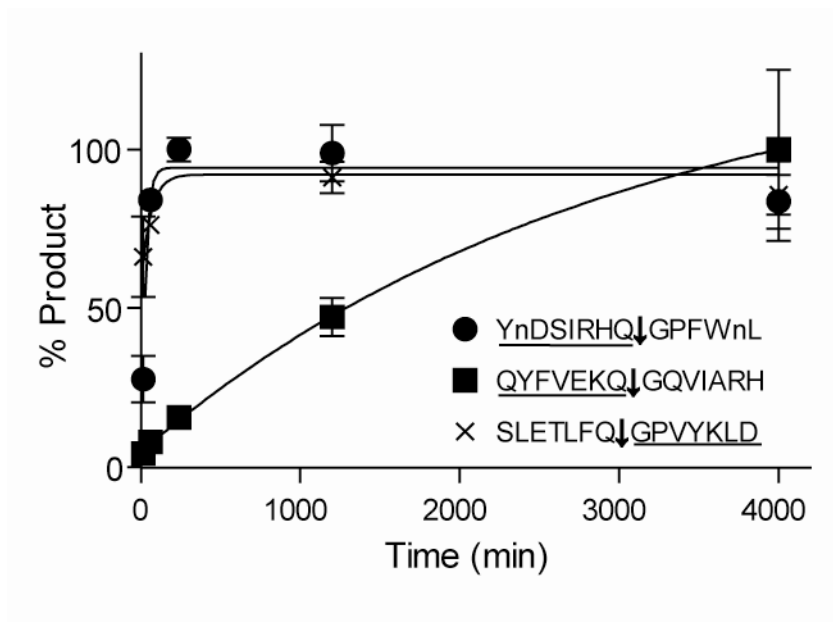

**Supplementary Figure 2:** Progress curve of three HRV 3C substrates in a MSP-MS assay containing eight peptides. No cleavage was observed for five of the peptides (see Supplementary Table 2). This assay was performed in triplicate and the fragments that were used for quantitation are underlined.

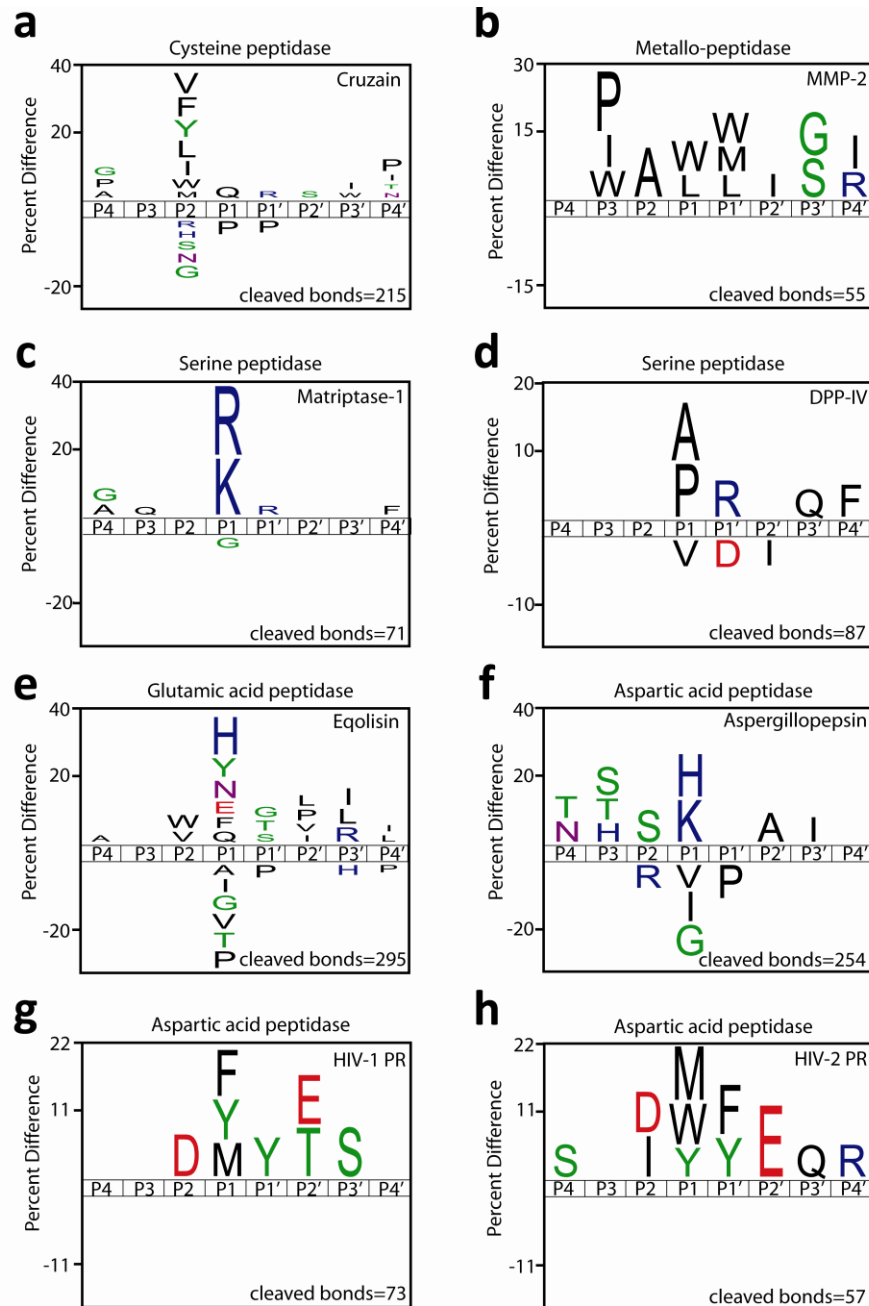

**Supplementary Figure 3: Substrate profiles of representative exo- and endo-peptidases from multiple families.** IceLogos were generated for amino acids in the P4 to P4' position that are enriched or de-enriched after 1200 minutes incubation of each peptidase with peptide library. **(a)** Cruzain from *Trypanosoma cruzi* showed preference for hydrophobic residues in the P2 position **(b)** human MMP-2 preferred Pro at P3, Ala at P2 and Gly or Ser at P3' **(c)** human matriptase-1 specificity was dominated by Arg and Lys at P1. **(d)** human DPP-IV had a preference of Pro and Ala at P1, **(e)** the fungal glutamic acid peptidase eqolisin preferred bulky residues at P1 and small residues at P1', **(f)** the fungal aspartic acid protease, aspergillopepsin had broad specificity but preferred positively charged residues at P1 and **(g-h)** HIV-1 and HIV-2 protease had similar specificity with a preference for bulky residues at P1 and P1' and Glu at P2'. All cleavage sites used to generate iceLogos are listed in the Supplementary "MSP-MS cleavages" file.

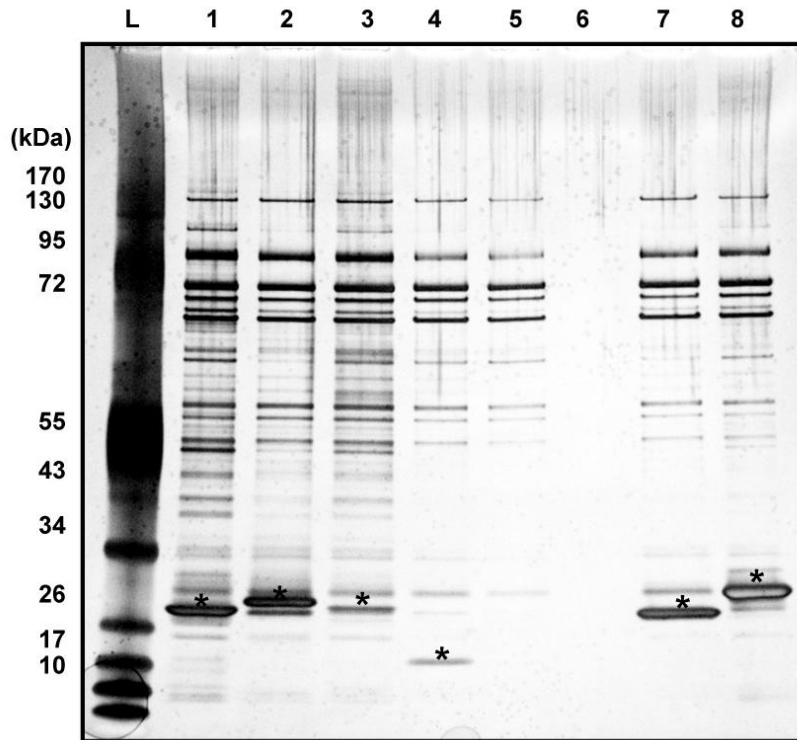

**Supplemental Figure 4: Silver stain gel showing partially purified viral 3C proteases.** IVTT protease preparations were separated by SDS-PAGE on 4-20% acrylamide Bis-TRIS gels run in MOPS-SDS buffer, then silver stained for imaging. Lanes are: 1) HRV14 3C; 2) Poliovirus 3C; 3) Klassevirus 3C; 4) Poliovirus 2A; 5) Klassevirus 2A, 6) Empty, 7) Enterovirus 71 3C and 8) Hepatitis A Virus 3C. Protease bands are indicated with an asterisk (\*). Klassevirus 2A failed to express in the IVTT system. Stock enzyme concentrations for each sample were estimated as 7.5  $\mu$ M HRV14 3C, 7.5  $\mu$ M Poliovirus 3C, 1  $\mu$ M Klassevirus 3C, 0.7 $\mu$ M Poliovirus 2A, 11 $\mu$ M Enterovirus and 14 $\mu$ M Hepatitis A Virus 3C.

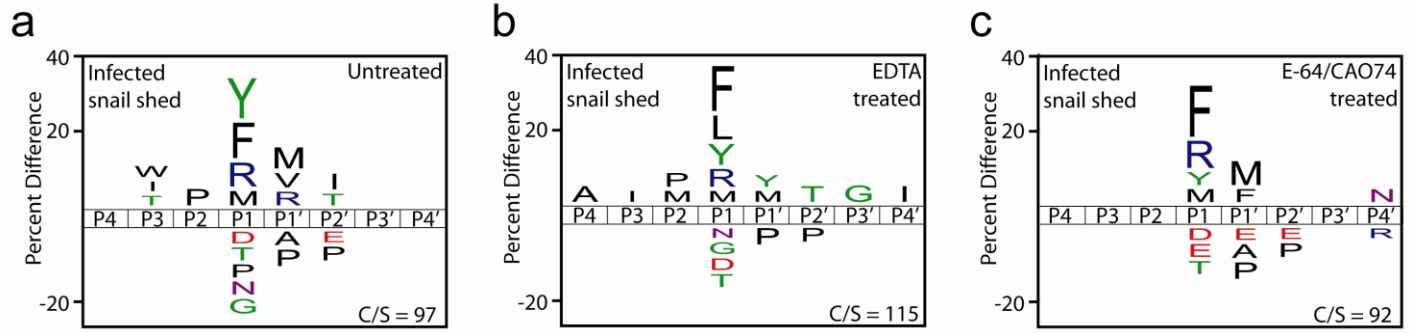

**Supplementary Figure 5: Comparison of untreated *Schistosoma mansoni* infected fresh water snails with EDTA and E-64/CAO74 treated samples.** Substrate signature illustrates all cleavage sites observed within 240 minutes of incubation with the peptide library.
